# Supplementary material
Source: MDPI journal article supplement (https://www.mdpi.com/2073-4344/8/9/390)
Supplement: s1 [file s1]

## Supporting Information

**-for-**

### **Enhanced catalytic dechlorination of 1,2-dichlorobenzene using Ni/Pd bimetallic nanoparticles prepared by a pulsed laser ablation in liquid**

Hyeon Jin Jung<sup>a†</sup>, Ravindranadh Koutavarapu<sup>a†</sup>, Seung Jun Lee<sup>a</sup>, Sung Kuk Kim<sup>a</sup>, Hyun Chul Choi<sup>b\*</sup> and Myong Yong Choi<sup>a\*</sup>

<sup>a</sup>*Department of Chemistry (BK21+) and Research Institute of Natural Science, Gyeongsang National University, Jinju 52828, Republic of Korea*

<sup>b</sup>*Department of Chemistry, Chonnam National University, Gwangju 61186, Republic of Korea*

\* To whom correspondence should be addressed: chc12@chonnam.ac.kr (H.C. Choi), [mychoi@gnu.ac.kr](mailto:mychoi@gnu.ac.kr) (M. Y. Choi) Tel: +82-55-772-1492

† These authors contributed equally to this work

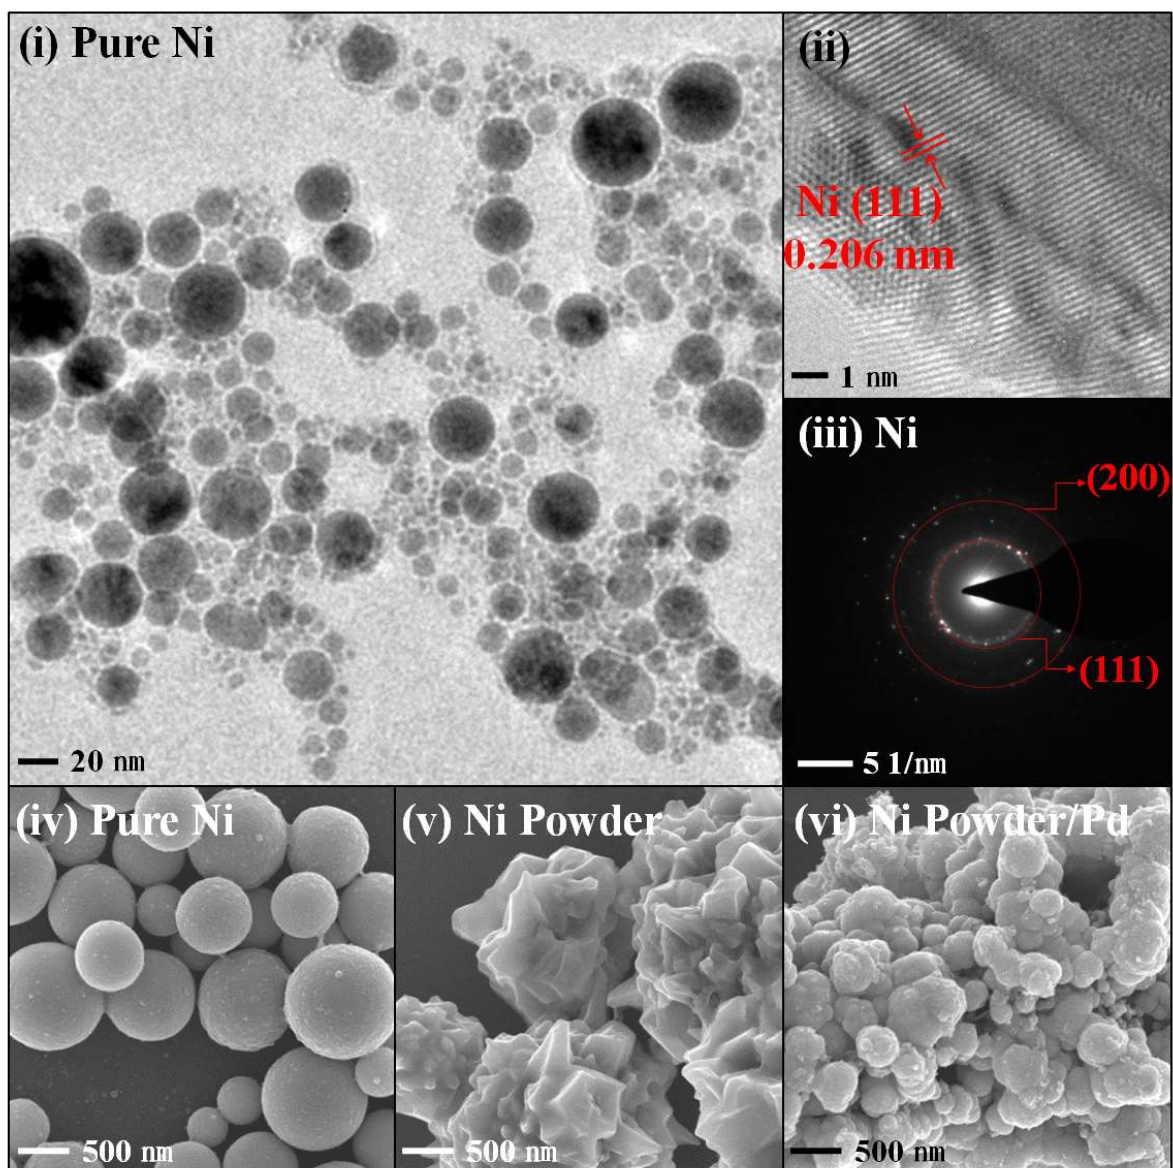

**Fig. S1** (i) HRTEM, (ii) enlarged image, and (iii) SAED patterns of pure Ni NPs. (iv) FE-SEM images of (iv) pure Ni NPs, (v) Ni powder, and (vi) Ni powder/Pd NPs
